# Supplementary material
Source: MDPI journal article supplement (https://www.mdpi.com/2072-4292/14/7/1721)
Supplement: s1 [file s1]

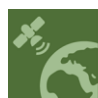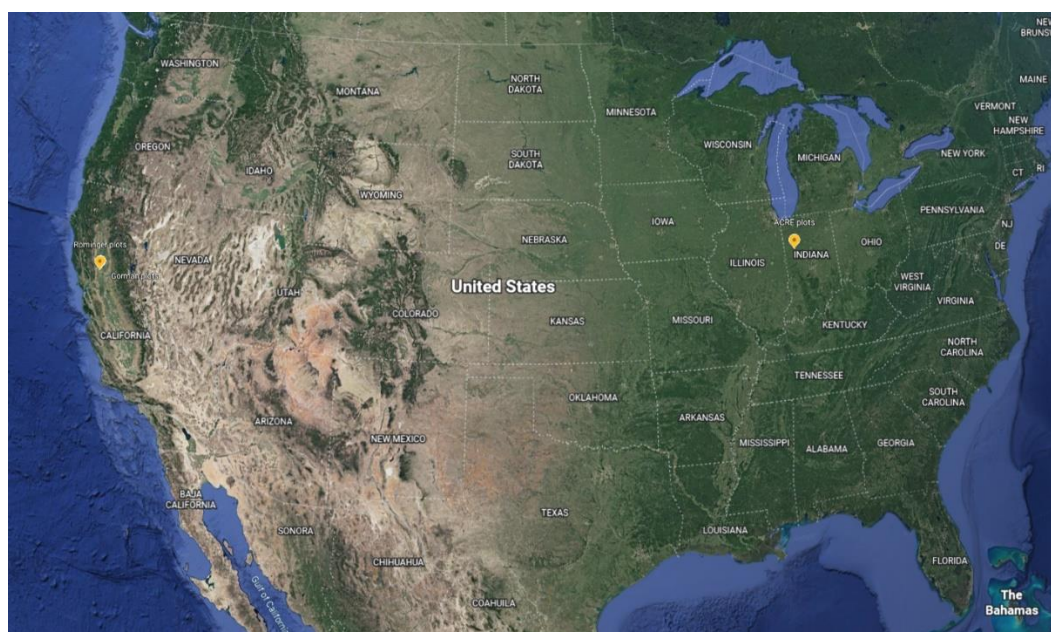

**Figure S1.** Experiment site locations in Woodland, California (yellow location pin marked as “Rominger plots”) and West Lafayette, Indiana (yellow location pin marked as “ACRE plots”) [75].

**Table S1.** Monthly weather averages (precip = precipitation; temp = temperature; deg = degrees).

| Year | Location | Month     | Mean Monthly Precip (mm) | Mean Air Temp (deg C) | 30-Year Mean Monthly Precip (mm) | 30-Year Mean Temp (deg C) |
|------|----------|-----------|--------------------------|-----------------------|----------------------------------|---------------------------|
| 2014 | Woodland | May       | 0                        | 21.3                  | 16.8                             | 20.2                      |
|      |          | June      | 0                        | 23.3                  | 5.6                              | 23.5                      |
|      |          | July      | 0                        | 24.9                  | 0                                | 25.4                      |
|      |          | August    | 0.8                      | 23.6                  | 1.3                              | 24.8                      |
|      |          | September | 10.4                     | 22.8                  | 2.8                              | 23.4                      |
|      |          | October   | 22.6                     | 19.6                  | 21.3                             | 18.8                      |
| 2017 | ACRE     | May       | 156.0                    | 15.8                  | 120.4                            | 16.7                      |
|      |          | June      | 156.5                    | 22.3                  | 125.5                            | 21.8                      |
|      |          | July      | 179.8                    | 23.5                  | 112.8                            | 22.9                      |
|      |          | August    | 123.9                    | 20.7                  | 94.5                             | 21.9                      |
|      |          | September | 50.5                     | 19.2                  | 78.0                             | 18.4                      |
|      |          | October   | 67.9                     | 14.2                  | 78.5                             | 12.0                      |

**Table S2.** Soil nutrient characteristics.

| Year | Location | Soil Depth (cm) | pH  | Organic Matter (%) | K (mg kg <sup>-1</sup> ) | P (mg kg <sup>-1</sup> ) | Mg (meq L <sup>-1</sup> ) | Ca (meq L <sup>-1</sup> ) | CEC (meq 100g <sup>-1</sup> ) |
|------|----------|-----------------|-----|--------------------|--------------------------|--------------------------|---------------------------|---------------------------|-------------------------------|
| 2014 | Gorman   | 0–15            | 7.6 | 1.60               | 225                      | 43                       | 3.0                       | 2.8                       | 22.5                          |
|      |          | 15–30           | 7.8 | 1.47               | 237                      | 13                       | 3.9                       | 3.6                       | 23.2                          |
|      | Rominger | 0–15            | 7.6 | 2.70               | 225                      | 7                        | 1.6                       | 1.6                       | 25.8                          |
|      |          | 15–30           | 7.6 | 2.26               | 169                      | 4                        | 1.7                       | 1.9                       | 26.9                          |
| 2017 | ACRE     | 0–20            | 6.4 | 3.1                | 151                      | 20                       | 610 ppm                   | 2221 ppm                  | 18.7                          |

**Treatment effect on biomass at R6:** In the ground reference total dry matter model (stover + grain biomass at R6; TDM), the individual main effects of hybrid, N treatment, and plant

density were significant, yet none of the interactions were significant (Table S3). This model accounted for approximately 60% of the variability in the data. Location effects, which included the blocking effects, accounted for the largest portion of explained variability. This was not surprising considering the large difference in environment between our locations in CA and IN. Significant biomass differences between hybrids were found across N rates and densities. Hybrids with the highest biomass were DAS05 and DAS08, significantly greater than DAS09 (Table S4). Increased N levels resulted in significantly greater biomass than those under low N conditions, across all hybrids. Additionally, higher biomass levels were evident at the high planting density.

**Treatment effect on total N content:** Total N content (TNC) was measured at V12, R1 and R6, and ground reference models were built for each of these measurements. The models for TNC had good fit with residuals less than 30% (Table S3). Location alone accounted for more than 60% of the variability in the data across all three models indicating the substantial effect that environment had on the availability and uptake of N, as anticipated. It is well documented that availability of mineral N (N sourced from organic or non-organic matter) is strongly affected by precipitation, temperature, microbial flora, and soil type [1,76–78]. For TNC at V12, only N and plant density had significant effects on the model (Table S3). By R1, neither hybrid nor N alone were significant main effects for TNC, though plant density continued as a significant fixed effect. Interestingly, there was some hybrid separation at R1 (Table S4). DAS03 had a significantly higher R1 TNC least square mean estimate than DAS07. At R6 all three main fixed effects, hybrid, N, and plant density were significant. However, there was no significant hybrid separation in the conservative Tukey–Kramer analysis, hence TNC was not identified as an N parameter warranting further investigation with HSI.

**Treatment effect on grain yield:** The mixed model evaluating the treatment effects on grain yield at all 3 locations explained about 70% of the variability in the data (Table S3). Location effects accounted for more than 70% of the data variability revealing a substantial environmental effect on final grain yields. Hybrid was the only significant main fixed effect for yield.

**Table S3.** Mixed model analysis of treatment effects and interactions on physiological characteristics across 3 site-years ( $\alpha = 0.10$ ).

| Var       | Summary of Fit Model Statistics |        | Random Effects    |      | Type 3 Tests of Fixed Effects |    |        |         |
|-----------|---------------------------------|--------|-------------------|------|-------------------------------|----|--------|---------|
|           |                                 |        | REML Var Comp Est |      | Effect                        | DF | Den DF | Pr > F  |
|           |                                 |        | (% of Total)      |      |                               |    |        |         |
| TDM at R6 | N Obs                           | 427    | Loc               | 37.4 | H                             | 8  | 12     | 0.052   |
|           |                                 |        |                   |      | N                             | 2  | 4      | 0.068   |
|           | AIC                             | 1892.2 | N*Loc             | 10.4 | PD                            | 1  | 363    | <0.0001 |
|           |                                 |        |                   |      | H*N                           | 16 | 363    | ns      |
|           | Res(%)                          | 43.0   | H*Loc             | 9.2  | H*PD                          | 8  | 363    | ns      |
|           |                                 |        |                   |      | N*PD                          | 2  | 363    | ns      |
| TNC V12   | N Obs                           | 364    | Loc               | 69.6 | H                             | 8  | 12     | ns      |
|           |                                 |        |                   |      | N                             | 2  | 3      | 0.013   |
|           | AIC                             | -37.7  | N*Loc             | 2.2  | PD                            | 1  | 301    | 0.002   |
|           |                                 |        |                   |      | H*N                           | 16 | 301    | ns      |
|           | Res(%)                          | 28.2   |                   |      | H*PD                          | 8  | 301    | ns      |
|           |                                 |        |                   |      | N*PD                          | 2  | 301    | ns      |
| TNC R1    | N Obs                           | 252    | Loc               | 66.2 | H                             | 8  | 12     | ns      |
|           |                                 |        |                   |      | N                             | 2  | 4      | ns      |
|           | AIC                             | 2138   | N*Loc             | 10.8 | PD                            | 1  | 190    | 0.003   |
|           |                                 |        |                   |      | H*N                           | 16 | 190    | 0.040   |
|           | Res(%)                          | 20.3   | H*Loc             | 2.7  | H*PD                          | 8  | 190    | 0.007   |
|           |                                 |        |                   |      | N*PD                          | 2  | 190    | ns      |

|        |        |        |       |      |      |    |     |       |
|--------|--------|--------|-------|------|------|----|-----|-------|
| TNC R6 | N Obs  | 363    | Loc   | 60.3 | H    | 8  | 12  | 0.077 |
|        |        |        |       |      | N    | 2  | 4   | 0.035 |
|        | AIC    | 3132.1 | N*Loc | 18.3 | PD   | 1  | 299 | 0.045 |
|        |        |        |       |      | H*N  | 16 | 299 | ns    |
|        | Res(%) | 18.4   | H*Loc | 3    | H*PD | 8  | 299 | ns    |
| GY     |        |        |       |      | N*PD | 2  | 299 | ns    |
|        | N Obs  | 501    | Loc   | 37.2 | H    | 8  | 12  | 0.005 |
|        |        |        |       |      | N    | 2  | 4   | ns    |
|        | AIC    | 1747.9 | N*Loc | 25.4 | PD   | 1  | 436 | ns    |
|        |        |        |       |      | H*N  | 16 | 436 | ns    |
|        | Res(%) | 27.2   | H*Loc | 10.3 | H*PD | 8  | 436 | 0.016 |
|        |        |        |       |      | N*PD | 2  | 436 | 0.001 |

Notes: TDM = Total Dry Matter (Mg ha<sup>-1</sup>) (stover + grain); TNC = Total Nitrogen Content (kg N ha<sup>-1</sup>); GY = Grain Yield at 15.5% moisture content; N Obs = number of observations; AIC = Akaike's Information Criterion; Loc = Location and Blocking effects; N = Nitrogen Treatment; H = Hybrid; PD = Plant Density; DF = Degrees of Freedom for numerator; Den DF = Degrees of Freedom for denominator; ns = Not Significant at  $\alpha = 0.10$ . For random effects % of total variability reported. For fixed effects, *p*-value reported.

**Table S4.** Least square mean estimates of plant biomass at R6 (TDM), and N content (TNC) at V12, R1 and R6 for the main fixed effects of hybrid (H), nitrogen (N), and plant density (PD).

| Trt Class | Main Fixed Effects | TDM R6 Estimate<br>(Mg ha <sup>-1</sup> ) |    |      | TNC V12 Estimate<br>(kg N ha <sup>-1</sup> ) |     |     | TNC R1 Estimate<br>(kg N ha <sup>-1</sup> ) |     |    | TNC R6 Estimate<br>(kg N ha <sup>-1</sup> ) |     |    |    |
|-----------|--------------------|-------------------------------------------|----|------|----------------------------------------------|-----|-----|---------------------------------------------|-----|----|---------------------------------------------|-----|----|----|
|           |                    | Means                                     | SE |      | Means                                        | LCL | UCL | Means                                       | SE  |    | Means                                       | SE  |    |    |
| H         | DAS01              | 22.53                                     | AB | 1.53 | 130                                          | ns  | 127 | 133                                         | 170 | AB | 31                                          | 212 | ns | 28 |
|           | DAS02              | 22.71                                     | AB | 1.44 | 138                                          | ns  | 136 | 140                                         | 173 | AB | 30                                          | 211 | ns | 27 |
|           | DAS03              | 23.47                                     | AB | 1.44 | 133                                          | ns  | 131 | 135                                         | 195 | A  | 30                                          | 209 | ns | 27 |
|           | DAS04              | 22.24                                     | AB | 1.44 | 134                                          | ns  | 132 | 137                                         | 167 | AB | 30                                          | 199 | ns | 27 |
|           | DAS05              | 24.08                                     | A  | 1.44 | 137                                          | ns  | 135 | 140                                         | 174 | AB | 30                                          | 218 | ns | 27 |
|           | DAS06              | 22.25                                     | AB | 1.53 | 139                                          | ns  | 136 | 142                                         | 179 | AB | 30                                          | 214 | ns | 28 |
|           | DAS07              | 21.37                                     | AB | 1.53 | 118                                          | ns  | 116 | 121                                         | 148 | B  | 31                                          | 185 | ns | 28 |
|           | DAS08              | 24.54                                     | A  | 1.53 | 126                                          | ns  | 124 | 129                                         | 184 | AB | 31                                          | 223 | ns | 28 |
|           | DAS09              | 20.68                                     | B  | 1.44 | 130                                          | ns  | 128 | 132                                         | 170 | AB | 30                                          | 194 | ns | 27 |
| N         | High_N             | 24.25                                     | A  | 1.41 | 157                                          | A   | 155 | 158                                         | 199 | ns | 31                                          | 251 | A  | 29 |
|           | Med_N              | 22.67                                     | AB | 1.41 | 132                                          | A   | 130 | 134                                         | 166 | ns | 31                                          | 202 | AB | 29 |
|           | Low_N              | 21.03                                     | B  | 1.41 | 110                                          | B   | 109 | 112                                         | 155 | ns | 31                                          | 169 | B  | 29 |
| PD        | High               | 23.33                                     | A  | 1.30 | 136                                          | A   | 135 | 137                                         | 179 | A  | 29                                          | 210 | A  | 27 |
|           | Low                | 21.97                                     | B  | 1.30 | 127                                          | B   | 126 | 128                                         | 168 | B  | 29                                          | 205 | B  | 27 |

Note: Standard errors (SE) reported for all except TNC V12 where 95% upper and lower confidence limits (CL) are shown due to transformation of the response variable. Levels with different letters are significantly different by Tukey–Kramer HSD ( $\alpha = 0.10$ ) within a treatment class (trt class) and physiological variable; ns = not significant.

## References

- Ribaudo, M.; Hansen, L.; Livingston, M.; Mosheim, R.; Williamson, J.; Delgado, J. Nitrogen in agricultural systems: Implications for conservation policy. *USDA-ERS Econ. Res. Rep.* **2011**, *127*, 89.
- Mueller, S.M.; Messina, C.D.; Vyn, T.J. Simultaneous gains in grain yield and nitrogen efficiency over 70 years of maize genetic improvement. *Sci. Rep.* **2019**, *9*, 9095.
- Doering, O.; Galloway, J.; Theis, T.; Aneja, V.; Boyer, E.; Cassman, K.; Cowling, E.; Dickerson, R.; Herz, W.; Hey, D. *Reactive Nitrogen in the United States: An Analysis of Inputs, Flows, Consequences, and Management Options*; Board, E.S.A., Ed.; United States Environmental Protection Agency: Washington, DC, USA, 2011.
- Chen, K.; Vyn, T.J. Post-silking factor consequences for N efficiency changes over 38 years of commercial maize hybrids. *Front. Plant Sci.* **2017**, *8*, 1737. <https://doi.org/10.3389/fpls.2017.01737>.
- Ciampitti, I.A.; Vyn, T.J. Physiological perspectives of changes over time in maize yield dependency on nitrogen uptake and associated nitrogen efficiencies: A review. *Field Crops Res.* **2012**, *133*, 48–67. <https://doi.org/10.1016/j.fcr.2012.03.008>.
- DeBruin, J.L.; Schussler, J.R.; Mo, H.; Cooper, M. Grain yield and nitrogen accumulation in maize hybrids released during 1934 to 2013 in the US Midwest. *Crop Sci.* **2017**, *57*, 1431–1446. <https://doi.org/10.2135/cropsci2016.08.0704>.
- Moose, S.; Below, F.E. Biotechnology approaches to improving maize nitrogen use efficiency. In *Molecular Genetic Approaches to Maize Improvement*; Kriz, A.L., Larkins, B.A., Eds.; Springer: Berlin/Heidelberg, Germany, 2009; pp. 65–77.
- Moll, R.H.; Kamprath, E.J.; Jackson, W.A. Analysis and interpretation of factors which contribute to efficiency of nitrogen utilization. *Agron. J.* **1982**, *74*, 562–564. <https://doi.org/10.2134/agronj1982.00021962007400030037x>.
- Shrawat, A.; Zayed, A.; Lightfoot, D.A. (Eds.) *Engineering Nitrogen Utilization in Crop Plants*; Springer International Publishing: Berlin/Heidelberg, Germany, 2018.
- Salvagiotti, F.; Castellarin, J.M.; Miralles, D.J.; Pedrol, H.M. Sulfur fertilization improves nitrogen use efficiency in wheat by increasing nitrogen uptake. *Field Crops Res.* **2009**, *113*, 170–177. <https://doi.org/10.1016/j.fcr.2009.05.003>.
- Ciampitti, I.A.; Vyn, T.J. A comprehensive study of plant density consequences on nitrogen uptake dynamics of maize plants from vegetative to reproductive stages. *Field Crops Res.* **2011**, *121*, 2–18. <https://doi.org/10.1016/j.fcr.2010.10.009>.
- Gastal, F.; Lemaire, G.; Durand, J.-L.; Louarn, G. Quantifying crop responses to nitrogen and avenues to improve nitrogen-use efficiency. In *Crop Physiology*, 2nd ed.; Academic Press: Cambridge, MA, USA, 2015; pp. 161–206.
- Muñoz-Huerta, R.F.; Guevara-Gonzalez, R.G.; Contreras-Medina, L.M.; Torres-Pacheco, I.; Prado-Olivarez, J.; Ocampo-Velazquez, R.V. A review of methods for sensing the nitrogen status in plants: Advantages, disadvantages and recent advances. *Sensors* **2013**, *13*, 10823–10843. <https://doi.org/10.3390/s130810823>.
- Unkovich, M.; Herridge, D.; Peoples, M.; Cadisch, G.; Boddey, B.; Giller, K.; Alves, B.; Chalk, P. *Measuring Plant-Associated Nitrogen Fixation in Agricultural Systems*; Australian Centre for International Agricultural Research (ACIAR): Canberra, Australia, 2008.
- Zhao, D.; Raja Reddy, K.; Kakani, V.G.; Read, J.J.; Carter, G.A. Corn (*Zea mays* L.) growth, leaf pigment concentration, photosynthesis and leaf hyperspectral reflectance properties as affected by nitrogen supply. *Plant Soil* **2003**, *257*, 205–218. <https://doi.org/10.1023/a:1026233732507>.
- Araus, J.L.; Cairns, J.E. Field high-throughput phenotyping: The new crop breeding frontier. *Trends Plant Sci.* **2014**, *19*, 52–61. <https://doi.org/10.1016/j.tplants.2013.09.008>.
- Cobb, J.N.; DeClerck, G.; Greenberg, A.; Clark, R.; McCouch, S. Next-generation phenotyping: Requirements and strategies for enhancing our understanding of genotype–phenotype relationships and its relevance to crop improvement. *Theor. Appl. Genet.* **2013**, *126*, 867–887. <https://doi.org/10.1007/s00122-013-2066-0>.
- Jin, X.; Zarco-Tejada, P.; Schmidhalter, U.; Reynolds, M.P.; Hawkesford, M.J.; Varshney, R.K.; Yang, T.; Nie, C.; Li, Z.; Ming, B. High-throughput estimation of crop traits: A review of ground and aerial phenotyping platforms. *IEEE Geosci. Remote Sens. Mag.* **2020**, *9*, 200–231.
- Nguyen, G.N.; Kant, S. Improving nitrogen use efficiency in plants: Effective phenotyping in conjunction with agronomic and genetic approaches. *Funct. Plant Biol.* **2018**, *45*, 606. <https://doi.org/10.1071/fp17266>.
- Rodriguez Junior, F.A.; Ortiz-Monasterio, I.; Zarco-Tejada, P.J.; Ammar, K.; Gérard, B. Using precision agriculture and remote sensing techniques to improve genotype selection in a breeding program. In Proceedings of the 12th International Conference on Precision Agriculture (ICPA), Sacramento, CA, USA, 20–23 July 2014.
- White, J.W.; Andrade-Sanchez, P.; Gore, M.A.; Bronson, K.F.; Coffelt, T.A.; Conley, M.M.; Feldmann, K.A.; French, A.N.; Heun, J.T.; Hunsaker, D.J.; et al. Field-based phenomics for plant genetics research. *Field Crops Res.* **2012**, *133*, 101–112. <https://doi.org/10.1016/j.fcr.2012.04.003>.
- Lillesand, T.; Kiefer, R.W.; Chipman, J. *Remote Sensing and Image Interpretation*; John Wiley & Sons: Hoboken, NJ, USA, 2014.
- Campbell, J.B.; Wynne, R.H. *Introduction to Remote Sensing*; Guilford Press: New York, NY, USA, 2011.
- Mulla, D.J. Twenty five years of remote sensing in precision agriculture: Key advances and remaining knowledge gaps. *Biosyst. Eng.* **2013**, *114*, 358–371. <https://doi.org/10.1016/j.biosystemseng.2012.08.009>.
- Goel, P.K.; Prasher, S.O.; Landry, J.A.; Patel, R.M.; Viau, A.A.; Miller, J.R. Estimation of crop biophysical parameters through airborne and field hyperspectral remote sensing. *Trans. ASAE* **2003**, *46*, 1235–1246.
- Osborne, S.L.; Schepers, J.S.; Francis, D.D.; Schlemmer, M.R. Use of spectral radiance to estimate in-season biomass and grain yield in nitrogen- and water- stressed corn. *Crop Sci.* **2002**, *42*, 165–171.

27. Thenkabail, P.S.; Gumma, M.K.; Teluguntla, P.; Mohammed, I.A. Hyperspectral remote sensing of vegetation and agricultural crops. *Photogramm. Eng. Remote Sens.* **2014**, *80*, 697–723.
28. Thenkabail, P.S.; Smith, R.B.; De Pauw, E. Hyperspectral vegetation indices and their relationships with agricultural crop characteristics. *Remote Sens. Environ.* **2000**, *71*, 158–182.
29. Blackmer, T.M.; Schepers, J.S.; Varvel, G.E.; Walter-Shea, E.A. Nitrogen deficiency detection using reflected shortwave radiation from irrigated corn canopies. *Agron. J.* **1996**, *88*, 1–5.
30. Elsayed, S.; Darwish, W. Hyperspectral remote sensing to assess the water status, biomass, and yield of maize cultivars under salinity and water stress. *Bragantia* **2017**, *76*, 62–72.
31. Campbell, P.; Middleton, E.; McMurtrey, J.; Chappelle, E. Assessment of vegetation stress using reflectance or fluorescence measurements. *J. Environ. Qual.* **2007**, *36*, 832–845.
32. Osborne, S.L.; Schepers, J.S.; Francis, D.D.; Schlemmer, M.R. Detection of phosphorus and nitrogen deficiencies in corn using spectral radiance measurements. *Agron. J.* **2002**, *94*, 1215–1221.
33. Schlemmer, M.R.; Francis, D.D.; Shanahan, J.; Schepers, J.S. Remotely measuring chlorophyll content in corn leaves with differing nitrogen levels and relative water content. *Agron. J.* **2005**, *97*, 106–112.
34. Thenkabail, P.S.; Lyon, J.G.; Huete, A. *Hyperspectral Remote Sensing of Vegetation*; CRC Press: Boca Raton, FL, USA, 2012.
35. Midwestern Regional Climate Center. Available online: <https://mrcc.illinois.edu/CLIMATE/> (accessed on 8 June 2019).
36. Indiana State Climate Office. Available online: [www.iclimat.org](http://www.iclimat.org) (accessed on 2 December 2017).
37. Miller, R.O.; Gavlak, R.; Horneck, D. *Soil, Plant and Water Reference Methods for the Western Region*; WCC-103 Publication: Fort Collins, CO, USA, 2013; p. 156.
38. NCERA-13; Eliason, R.; Goos, R.J.; Hoskins, B. *Recommended Chemical Soil Test Procedures for the North Central Region*; NCERA-13, Ed.; Missouri Agricultural Experiment Station: Columbia, MO, USA, 2015; p. 76.
39. US EPA. Standard method 350.1: Nitrogen, ammonia (colorimetric, automated phenate). In *Methods for the Determination of Inorganic Substances in Environmental Samples*; Office of Research and Development, US EPA: Cincinnati, OH, USA, 1993.
40. US EPA. Method 353.2: Determination of Nitrate–Nitrite Nitrogen by Automated Colorimetry, Revision 2.0; O'Dell, J., Ed.; Environmental Monitoring Systems Laboratory: Cincinnati, OH, USA, 1993.
41. Dellavalle Laboratory Inc. *Soil Interpretation Report*; Kasapligil, D., Ed.; Dellavalle Laboratory, Inc.: Davis, CA, USA, 2014.
42. Vitosh, M.; Johnson, J.; Mengel, D. *Tri-State Fertilizer Recommendations for Corn, Soybeans, Wheat and Alfalfa*; Michigan State University Extension: East Lansing, MI, USA, 1995.
43. Rouse, J.W.J.; Haas, R.H.; Schell, J.A.; Deering, D.W.; Harlan, J.C. *Monitoring the Vernal Advancement and Retrogradation (Greenwave Effect) of Natural Vegetation*; Texas A&M University Remote Sensing Center: College Station, TX, USA, 1974.
44. Qi, J.; Chehbouni, A.; Huete, A.; Kerr, Y.; Sorooshian, S. A modified soil adjusted vegetation index. *Remote Sens. Environ.* **1994**, *48*, 119–126.
45. Chen, P.-F.; Nicolas, T.; Wang, J.-H.; Philippe, V.; Huang, W.-J.; Li, B.-G. New index for crop canopy fresh biomass estimation. *Spectrosc. Spectr. Anal.* **2010**, *30*, 512–517.
46. Merzlyak, M.N.; Gitelson, A.A.; Chivkunova, O.B.; Rakitin, V.Y. Non-destructive optical detection of pigment changes during leaf senescence and fruit ripening. *Physiol. Plant.* **1999**, *106*, 135–141.
47. Daughtry, C.S.T.; Walthall, C.L.; Kim, M.S.; Brown de Colstoun, E.; McMurtrey, J.E., III. Estimating corn leaf chlorophyll concentration from leaf and canopy reflectance. *Remote Sens. Environ.* **2000**, *74*, 229–239.
48. Chen, P.; Haboudane, D.; Tremblay, N.; Wang, J.; Vigneault, P.; Li, B. New spectral indicator assessing the efficiency of crop nitrogen treatment in corn and wheat. *Remote Sens. Environ.* **2010**, *114*, 1987–1997.
49. Xue, L.; Cao, W.; Luo, W.; Dai, T.; Zhu, Y. Monitoring leaf nitrogen status in rice with canopy spectral reflectance. *Agron. J.* **2004**, *96*, 135–142.
50. Kim, M.S.; Daughtry, C.; Chappelle, E.; McMurtrey, J.; Walthall, C. The use of high spectral resolution bands for estimating absorbed photosynthetically active radiation (A<sub>par</sub>). In Proceedings of the 6th Symposium on Physical Measurements and Signatures in Remote Sensing, Val D'Isere, France, 17–24 January 1994; pp. 299–306.
51. Kim, M.S. The Use of Narrow Spectral Bands for Improving Remote Sensing Estimations of Fractionally Absorbed Photosynthetically Active Radiation. In *Department of Geography*; University of Maryland: College Park, MD, USA, 1994.
52. Rondeaux, G.; Steven, M.; Baret, F. Optimization of soil-adjusted vegetation indices. *Remote Sens. Environ.* **1996**, *55*, 95–107.
53. Haboudane, D.; Miller, J.R.; Tremblay, N.; Zarco-Tejada, P.J.; Dextraze, L. Integrated narrow-band vegetation indices for prediction of crop chlorophyll content for application to precision agriculture. *Remote Sens. Environ.* **2002**, *81*, 416–426.
54. Barnes, E.; Clarke, T.; Richards, S.; Colaizzi, P.; Haberland, J.; Kostrzewski, M.; Waller, P.; Choi, C.; Riley, E.; Thompson, T. Coincident detection of crop water stress, nitrogen status and canopy density using ground based multispectral data. In Proceedings of the Fifth International Conference on Precision Agriculture, Bloomington, MN, USA, 16–19 July 2000.
55. Gitelson, A.A.; Gritz, Y.; Merzlyak, M.N. Relationships between leaf chlorophyll content and spectral reflectance and algorithms for non-destructive chlorophyll assessment in higher plant leaves. *J. Plant Physiol.* **2003**, *160*, 271–282.
56. Montgomery, D.C.; Peck, E.A.; Vining, G.G. *Introduction to Linear Regression Analysis*, 5th ed.; John Wiley & Sons: Hoboken, NJ, USA, 2012; Volume 821.
57. Bundy, L.; Carter, P. Corn hybrid response to nitrogen fertilization in the northern corn belt. *J. Prod. Agric.* **1988**, *1*, 99–104.
58. Jeschke, M.; DeBruin, J. Corn hybrid response to nitrogen fertilizer. In *Crop Insights*; DuPont Pioneer Agronomy Sciences: Johnston, Hungary, 2016; pp. 1–7.

59. Chevalier, P.; Schrader, L. Genotypic differences in nitrate absorption and partitioning of N among plant parts in maize. *Crop Sci.* **1977**, *17*, 897–901.
60. Sadras, V.O.; Calderini, D.F. *Crop Physiology: Applications for Genetic Improvement and Agronomy*, 2nd ed.; Academic Press: Cambridge, MA, USA, 2015.
61. Plénet, D.; Lemaire, G. Relationships between dynamics of nitrogen uptake and dry matter accumulation in maize crops. Determination of critical N concentration. *Plant Soil* **2000**, *216*, 65–82.
62. Haegerle, J.W.; Cook, K.A.; Nichols, D.M.; Below, F.E. Changes in nitrogen use traits associated with genetic improvement for grain yield of maize hybrids released in different decades. *Crop Sci.* **2013**, *53*, 1256. <https://doi.org/10.2135/cropsci2012.07.0429>.
63. D’Andrea, K.E.; Otegui, M.E.; Cirilo, A.G.; Eyhéabide, G.H. Ecophysiological traits in maize hybrids and their parental inbred lines: Phenotyping of responses to contrasting nitrogen supply levels. *Field Crops Res.* **2009**, *114*, 147–158. <https://doi.org/10.1016/j.fcr.2009.07.016>.
64. Schlemmer, M.; Gitelson, A.; Schepers, J.; Ferguson, R.; Peng, Y.; Shanahan, J.; Rundquist, D. Remote estimation of nitrogen and chlorophyll contents in maize at leaf and canopy levels. *Int. J. Appl. Earth Obs. Geoinf.* **2013**, *25*, 47–54. <https://doi.org/10.1016/j.jag.2013.04.003>.
65. Zhao, B.; Duan, A.; Ata-Ul-Karim, S.T.; Liu, Z.; Chen, Z.; Gong, Z.; Zhang, J.; Xiao, J.; Liu, Z.; Qin, A.; et al. Exploring new spectral bands and vegetation indices for estimating nitrogen nutrition index of summer maize. *Eur. J. Agron.* **2018**, *93*, 113–125. <https://doi.org/10.1016/j.eja.2017.12.006>.
66. Haboudane, D.; Tremblay, N.; Miller, J.R.; Vigneault, P. Remote estimation of crop chlorophyll content using spectral indices derived From hyperspectral data. *IEEE Trans. Geosci. Remote Sens.* **2008**, *46*, 423–437. <https://doi.org/10.1109/tgrs.2007.904836>.
67. Hunt Jr, E.R.; Doraiswamy, P.C.; McMurtrey, J.E.; Daughtry, C.S.; Perry, E.M.; Akhmedov, B. A visible band index for remote sensing leaf chlorophyll content at the canopy scale. *Int. J. Appl. Earth Obs. Geoinf.* **2013**, *21*, 103–112.
68. Zhou, K.; Cheng, T.; Zhu, Y.; Cao, W.; Ustin, S.L.; Zheng, H.; Yao, X.; Tian, Y. Assessing the impact of spatial resolution on the estimation of leaf nitrogen concentration over the full season of paddy rice using near-surface imaging spectroscopy data. *Front. Plant Sci.* **2018**, *9*, 964. <https://doi.org/10.3389/fpls.2018.00964>.
69. Boomsma, C.R.; Santini, J.B.; Tollenaar, M.; Vyn, T.J. Maize morphophysiological responses to intense crowding and low nitrogen availability: An analysis and review. *Agron. J.* **2009**, *101*, 1426. <https://doi.org/10.2134/agronj2009.0082>.
70. Buschmann, C.; Nagel, E. In vivo spectroscopy and internal optics of leaves as basis for remote sensing of vegetation. *Int. J. Remote Sens.* **1993**, *14*, 711–722. <https://doi.org/10.1080/01431169308904370>.
71. Thenkabail, P.S.; Smith, R.B.; De Pauw, E. Evaluation of narrowband and broadband vegetation indices for determining optimal hyperspectral wavebands for agricultural crop characterization. *Photogramm. Eng. Remote Sens.* **2002**, *68*, 607–622.
72. Blackburn, G.A. Quantifying chlorophylls and carotenoids at leaf and canopy scales: An evaluation of some hyperspectral approaches. *Remote Sens. Environ.* **1998**, *66*, 273–285. [https://doi.org/10.1016/S0034-4257\(98\)00059-5](https://doi.org/10.1016/S0034-4257(98)00059-5).
73. Goel, N.S.; Qin, W. Influences of canopy architecture on relationships between various vegetation indices and LAI and Fpar: A computer simulation. *Remote Sens. Rev.* **1994**, *10*, 309–347. <https://doi.org/10.1080/02757259409532252>.
74. Jiang, Z.; Chen, Y.; Li, J.; Dou, W. The impact of spatial resolution on NDVI over heterogeneous surface. In Proceedings of the 2005 IEEE International Geoscience and Remote Sensing Symposium, 2005, IGARSS’05, Seoul, Korea, 29 July 2005; pp. 1310–1313.
75. Google Data SIO, NOAA, U.S. Navy, NGA, GEBCO Landsat/Copernicus INEGI Data LDEO-Columbia, NSF, and N. IBCAO. Google Earth 2022. Available online: [earth.google.com](http://earth.google.com) (accessed on 11 March 2022).
76. Chenu, K. Characterizing the crop environment—nature, significance and applications. In *Crop Physiology*; Elsevier: Amsterdam, The Netherlands, 2015; pp. 321–348.
77. Connor, D.J.; Loomis, R.S.; Cassman, K.G. *Crop Ecology: Productivity and Management in Agricultural Systems*; Cambridge University Press: Cambridge, UK, 2011.
78. Schepers, J.S.; Raun, W. (Eds.) *Nitrogen in Agricultural Systems*; ASA-CSSA-SSSA: Madison, WI, USA, 2008.
